# Supplementary material for: Characterizing diabetic cardiomyopathy: baseline results from the ARISE-HF trial
Source: Springer Nature journal article supplement (doi:10.1186/s12933-024-02135-z), 2024-02-01
Supplement: MOESM1 [file 12933_2024_2135_MOESM1_ESM.pdf]

**Characterizing Diabetic Cardiomyopathy: Baseline Results from the ARISE-HF Trial**

**Supplemental Appendix**

**Supplemental Figure 1:** Countries participating in the ARISE-HF Trial and enrollment statistics.

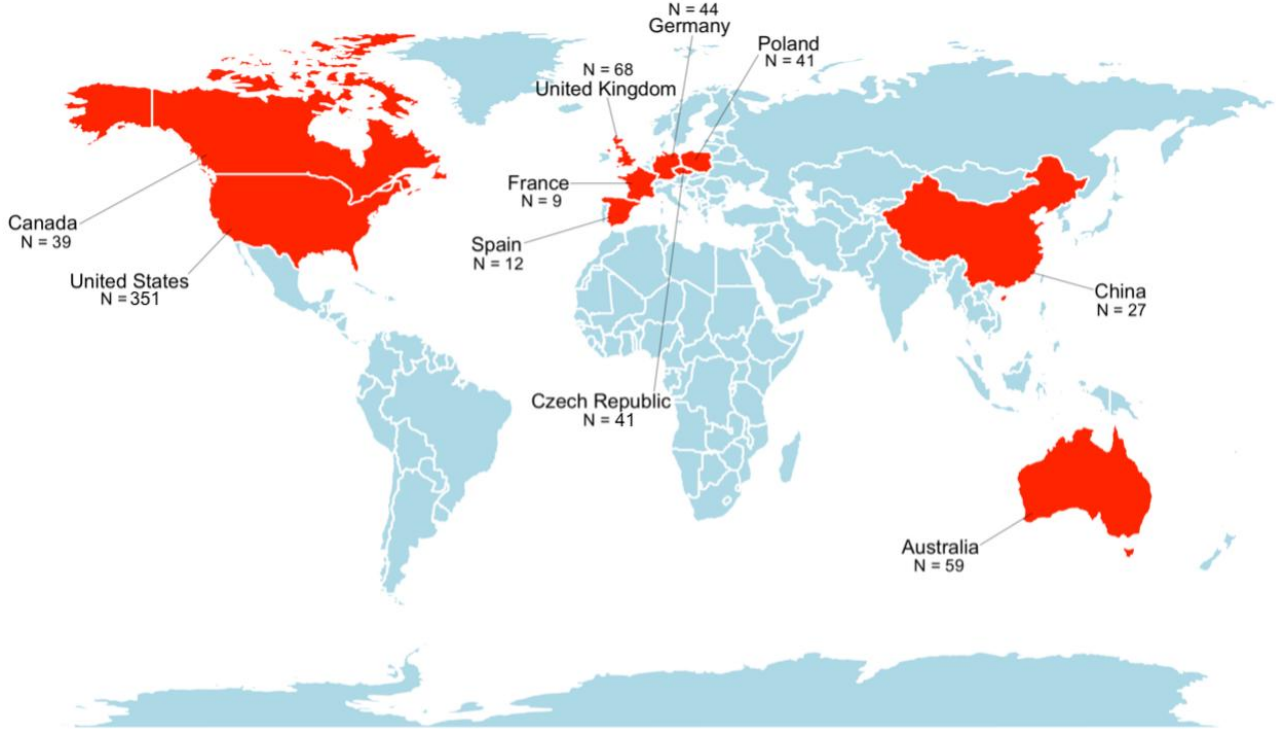

**Supplemental Table 1:** Key inclusion/exclusion criteria for the ARISE-HF Trial.

| Inclusion Criteria                                                                                                                                                                                                                                                                                                                                                                                                                                                                                                                                                                                                                                              | Exclusion Criteria                                                                                                                                                                                                                                                                                                                                                                                                                                                                                                                                                                                                                                                                                                                                                                                                    |
|-----------------------------------------------------------------------------------------------------------------------------------------------------------------------------------------------------------------------------------------------------------------------------------------------------------------------------------------------------------------------------------------------------------------------------------------------------------------------------------------------------------------------------------------------------------------------------------------------------------------------------------------------------------------|-----------------------------------------------------------------------------------------------------------------------------------------------------------------------------------------------------------------------------------------------------------------------------------------------------------------------------------------------------------------------------------------------------------------------------------------------------------------------------------------------------------------------------------------------------------------------------------------------------------------------------------------------------------------------------------------------------------------------------------------------------------------------------------------------------------------------|
| <ul style="list-style-type: none"> <li>• Diagnosis of T2DM</li> <li>• High risk for HF including advanced age, longstanding T2DM or CKD</li> <li>• Demonstration of DbCM with at least one of the following:               <ul style="list-style-type: none"> <li>○ Structural heart disease on echocardiography*</li> <li>○ NT-proBNP <math>\geq</math> 50 ng/L</li> <li>○ hs-cTnT <math>\geq</math> 6 ng/L</li> </ul> </li> <li>• Impaired exercise tolerance on cardiopulmonary exercise testing, with peak oxygen uptake <math>&lt;</math>75% of predicted and adequate exercise effort with a respiratory exchange ratio <math>\geq</math> 1.05</li> </ul> | <ul style="list-style-type: none"> <li>• Past or present diagnosis of symptomatic (stage C/D) HF or other forms of heart muscle disease</li> <li>• Past or present LVEF <math>&lt;</math>40%</li> <li>• Past or present use of loop diuretics</li> <li>• Prior acute coronary syndrome or stroke</li> <li>• Significant coronary artery disease with or without revascularization</li> <li>• Severe valvular heart disease</li> <li>• Recent cardiac arrhythmia</li> <li>• Uncontrolled hypertension</li> <li>• Hemoglobin A1c <math>&gt;</math> 8.5%</li> <li>• Hemoglobin <math>&lt;</math> 10.0 g/dL</li> <li>• eGFR <math>&lt;</math> 45 mL/min/1.73m<sup>2</sup></li> <li>• Body-mass index <math>\geq</math> 45 Kg/m<sup>2</sup></li> <li>• Inability to exercise</li> <li>• Recurrent kidney stones</li> </ul> |

T2DM denotes: type 2 diabetes mellitus; HF denotes: heart failure; CKD denotes: chronic kidney disease; DbCM denotes: diabetic cardiomyopathy; LVEF denotes: left ventricular ejection fraction; g/dL denotes: grams/deciliter; eGFR denotes: estimated glomerular filtration rate; mL/min/1.73m<sup>2</sup> denotes: milliliters/minute/1.73 squared meters; Kg/m<sup>2</sup> denotes: kilograms per squared meter

**Supplemental Table 2:** A comparison of selected baseline characteristics of those patients not included versus those included in the ARISE-HF Trial.

|                                    | <b>Excluded</b> | <b>Included</b> | <b>p</b> |
|------------------------------------|-----------------|-----------------|----------|
| n                                  | 1416            | 691             |          |
| Age, mean (SD)                     | 66.8 (8.2)      | 67.4 (7.2)      | 0.12     |
| Female sex, N (%)                  | 670 (47.3)      | 348 (50.4)      | 0.21     |
| Race, N (%)                        |                 |                 | 0.15     |
| White, non-Hispanic                | 877 (61.9)      | 432 (62.5)      |          |
| Hispanic                           | 294 (20.8)      | 151 (21.9)      |          |
| Black                              | 119 (8.4)       | 42 (6.1)        |          |
| Asian                              | 109 (7.7)       | 56 (8.1)        |          |
| American Indian or Alaskan Native  | 2 (0.1)         | 4 (0.6)         |          |
| Other                              | 15 (1.1)        | 6 (0.9)         |          |
| Smoking, N (%)                     |                 |                 | 0.81     |
| Current                            | 135 (9.6)       | 64 (9.3)        |          |
| Previous                           | 470 (33.3)      | 240 (34.7)      |          |
| Never                              | 806 (57.1)      | 387 (56.0)      |          |
| Duration of T2DM, years, mean (SD) | 14.2 (8.3)      | 14.5 (10.1)     | 0.75     |

SD denotes: standard deviation, T2DM denotes: type 2 diabetes mellitus
